# Supplementary material for: Importance of Conjugation of the Bile Salt on the Mechanism of Lipolysis
Source: MDPI journal article supplement (doi:10.3390/molecules26195764), 2021-09-23
Supplement: s1 [file s1]

# Importance of conjugation of the bile salt on the mechanism of lipolysis

Natalia Łozińska, and Christian Jungnickel\*

*Department of Colloid and Lipid Science, Faculty of Chemistry, Gdańsk University of Technology  
ul. Narutowicza 11/12, Gdańsk 80-233, Poland,*

\*Corresponding author: Christian Jungnickel, email:christian.jungnickel@pg.edu.pl

## Supporting Information

Table S1 CMC data

| Bile salt | CMC   | Temperature [K] | Reference                                               |
|-----------|-------|-----------------|---------------------------------------------------------|
| NaC       | 10.80 | 283.15          | (Mukherjee et al. 2016)                                 |
| NaC       | 12.50 | 283.15          | (Mukherjee et al. 2016)                                 |
| NaC       | 17.90 | 283.15          | (Olesen, Westh, and Holm 2015)                          |
| NaC       | 8.80  | 283.15          | (Maestre, Guardado, and Moyá 2014)                      |
| NaC       | 8.02  | 293.15          | (Rub et al. 2013)                                       |
| NaC       | 7.78  | 293.15          | (Mukherjee et al. 2016)                                 |
| NaC       | 8.25  | 293.15          | (Mukherjee et al. 2016)                                 |
| NaC       | 8.02  | 293.15          | (Kabir-ud-Din, Rub, and Naqvi 2011)                     |
| NaC       | 14.40 | 293.15          | (Kumar, Patial, and Chauhan 2015)                       |
| NaC       | 8.67  | 298.15          | (Rub et al. 2013)                                       |
| NaC       | 9.70  | 298.15          | (Olesen et al. 2015)                                    |
| NaC       | 9.00  | 298.15          | (Azum, Rub, and Asiri 2019)                             |
| NaC       | 9.00  | 298.15          | (Miyajima, K., Yokoi, M., Komatsu, H., & Nakagaki 1986) |
| NaC       | 10.00 | 298.15          | (Faustino et al. 2014)                                  |
| NaC       | 11.30 | 298.15          | (Faustino et al. 2014)                                  |
| NaC       | 6.20  | 298.15          | (Ninomiya, Matsuoka, and Moroi 2003)                    |
| NaC       | 12.90 | 298.15          | (Ćirin, Poša, and Krstonošić 2011)                      |
| NaC       | 12.78 | 298.15          | (Ćirin et al. 2011)                                     |
| NaC       | 12.90 | 298.15          | (Ćirin et al. 2011)                                     |
| NaC       | 12.73 | 298.15          | (Ćirin et al. 2011)                                     |
| NaC       | 16.00 | 298.15          | (Subuddhi and Mishra 2007)                              |
| NaC       | 10.20 | 298.15          | (Yadav, Parikh, and Kumar 2017)                         |
| NaC       | 13.00 | 298.15          | (Roda, Hofmann, and Mysels 1983)                        |
| NaC       | 11.10 | 298.15          | (Poša, Ćirin, and Krstonošić 2013)                      |
| NaC       | 8.67  | 298.15          | (Kabir-ud-Din et al. 2011)                              |
| NaC       | 14.10 | 298.15          | (Kumar et al. 2015)                                     |
| NaC       | 7.98  | 298.15          | (Mahajan and Mahajan 2012)                              |
| NaC       | 6.20  | 298.15          | (Matsuoka and Moroi 2002)                               |
| NaC       | 11.00 | 298.15          | (Nakashima et al. 2002)                                 |
| NaC       | 10.20 | 298.15          | (Maestre et al. 2014)                                   |

|       |       |        |                                                         |
|-------|-------|--------|---------------------------------------------------------|
| NaC   | 9.10  | 298.15 | (Poša et al. 2015)                                      |
| NaC   | 8.80  | 298.15 | (Poša et al. 2015)                                      |
| NaC   | 5.18  | 303.15 | (Jana and Moulik 1991)                                  |
| NaC   | 9.12  | 303.15 | (Jana and Moulik 1991)                                  |
| NaC   | 7.22  | 303.15 | (Jana and Moulik 1991)                                  |
| NaC   | 9.06  | 303.15 | (Rub et al. 2013)                                       |
| NaC   | 5.89  | 303.15 | (Mukherjee et al. 2016)                                 |
| NaC   | 7.35  | 303.15 | (Mukherjee et al. 2016)                                 |
| NaC   | 9.06  | 303.15 | (Kabir-ud-Din et al. 2011)                              |
| NaC   | 14.00 | 303.15 | (Kumar et al. 2015)                                     |
| NaC   | 6.10  | 310.15 | (Mukherjee et al. 2016)                                 |
| NaC   | 18.80 | 310.15 | (Olesen et al. 2015)                                    |
| NaC   | 7.50  | 310.15 | (Mukherjee et al. 2016)                                 |
| NaC   | 9.40  | 310.15 | (Maestre et al. 2014)                                   |
| NaC   | 14.30 | 313.15 | (Kumar et al. 2015)                                     |
| NaC   | 17.50 | 323.15 | (Olesen et al. 2015)                                    |
| NaC   | 19.10 | 323.15 | (Maestre et al. 2014)                                   |
| NaCDC | 3.00  | 298.15 | (Ninomiya et al. 2003)                                  |
| NaCDC | 9.00  | 298.15 | (Roda et al. 1983)                                      |
| NaCDC | 4.60  | 298.15 | (Nakashima et al. 2002)                                 |
| NaCDC | 5.80  | 298.15 | (Poša et al. 2015)                                      |
| NaCDC | 5.50  | 298.15 | (Poša et al. 2015)                                      |
| NaDC  | 2.95  | 283.15 | (Sugihara and Tanaka 1976)                              |
| NaDC  | 6.30  | 283.15 | (Olesen et al. 2015)                                    |
| NaDC  | 4.65  | 283.15 | (Mukherjee et al. 2016)                                 |
| NaDC  | 5.82  | 283.15 | (Mukherjee et al. 2016)                                 |
| NaDC  | 6.60  | 283.15 | (Maestre et al. 2014)                                   |
| NaDC  | 3.35  | 283.15 | (Sugihara and Tanaka 1976)                              |
| NaDC  | 3.24  | 283.15 | (Sugihara and Tanaka 1976)                              |
| NaDC  | 2.30  | 283.15 | (Matsuoka and Moroi 2002)                               |
| NaDC  | 3.55  | 293.15 | (Sugihara and Tanaka 1976)                              |
| NaDC  | 3.47  | 293.15 | (Sugihara and Tanaka 1976)                              |
| NaDC  | 1.50  | 293.15 | (Carey and Small 1969)                                  |
| NaDC  | 2.95  | 293.15 | (Rub et al. 2013)                                       |
| NaDC  | 3.80  | 293.15 | (Mukherjee et al. 2016)                                 |
| NaDC  | 5.36  | 293.15 | (Mukherjee et al. 2016)                                 |
| NaDC  | 2.95  | 293.15 | (Kabir-ud-Din et al. 2011)                              |
| NaDC  | 6.00  | 293.15 | (Kumar et al. 2015)                                     |
| NaDC  | 4.10  | 298.15 | (Juna, K., & Sugano 1969)                               |
| NaDC  | 2.00  | 298.15 | (Small 1971)                                            |
| NaDC  | 4.30  | 298.15 | (Olesen et al. 2015)                                    |
| NaDC  | 7.94  | 298.15 | (Sugihara and Tanaka 1976)                              |
| NaDC  | 1.70  | 298.15 | (Sugihara and Tanaka 1976)                              |
| NaDC  | 4.20  | 298.15 | (Miyajima, K., Yokoi, M., Komatsu, H., & Nakagaki 1986) |
| NaDC  | 4.50  | 298.15 | (Jana and Moulik 1991)                                  |

|      |       |        |                                                         |
|------|-------|--------|---------------------------------------------------------|
| NaDC | 2.40  | 298.15 | (Matsuoka and Moroi 2002)                               |
| NaDC | 4.00  | 298.15 | (Nakashima et al. 2002)                                 |
| NaDC | 2.40  | 298.15 | (Ninomiya et al. 2003)                                  |
| NaDC | 6.00  | 298.15 | (Subuddhi and Mishra 2007)                              |
| NaDC | 4.30  | 298.15 | (Ćirin et al. 2011)                                     |
| NaDC | 4.25  | 298.15 | (Ćirin et al. 2011)                                     |
| NaDC | 4.16  | 298.15 | (Ćirin et al. 2011)                                     |
| NaDC | 3.02  | 298.15 | (Kabir-ud-Din et al. 2011)                              |
| NaDC | 4.30  | 298.15 | (Ćirin et al. 2011)                                     |
| NaDC | 4.25  | 298.15 | (Ćirin et al. 2011)                                     |
| NaDC | 2.90  | 298.15 | (Mahajan and Mahajan 2012)                              |
| NaDC | 3.02  | 298.15 | (Kabir-ud-Din et al. 2011)                              |
| NaDC | 3.07  | 298.15 | (Poša et al. 2013)                                      |
| NaDC | 5.56  | 298.15 | (Faustino et al. 2014)                                  |
| NaDC | 5.74  | 298.15 | (Faustino et al. 2014)                                  |
| NaDC | 4.50  | 298.15 | (Maestre et al. 2014)                                   |
| NaDC | 5.40  | 298.15 | (Kumar et al. 2015)                                     |
| NaDC | 4.50  | 298.15 | (Yadav et al. 2017)                                     |
| NaDC | 3.25  | 298.15 | (Azum et al. 2019)                                      |
| NaDC | 3.97  | 303.00 | (Jana and Moulik 1991)                                  |
| NaDC | 2.75  | 303.00 | (Jana and Moulik 1991)                                  |
| NaDC | 7.94  | 303.00 | (Jana and Moulik 1991)                                  |
| NaDC | 4.80  | 303.00 | (Sugihara and Tanaka 1976)                              |
| NaDC | 4.57  | 303.00 | (Sugihara and Tanaka 1976)                              |
| NaDC | 3.11  | 303.15 | (Rub et al. 2013)                                       |
| NaDC | 3.02  | 303.15 | (Mukherjee et al. 2016)                                 |
| NaDC | 4.05  | 303.15 | (Mukherjee et al. 2016)                                 |
| NaDC | 3.11  | 303.15 | (Kabir-ud-Din et al. 2011)                              |
| NaDC | 5.10  | 303.15 | (Kumar et al. 2015)                                     |
| NaDC | 8.20  | 310.15 | (Maestre et al. 2014)                                   |
| NaDC | 8.12  | 310.15 | (Olesen et al. 2015)                                    |
| NaDC | 8.20  | 310.15 | (Olesen et al. 2015)                                    |
| NaDC | 6.10  | 313.15 | (Sugihara and Tanaka 1976)                              |
| NaDC | 3.16  | 313.15 | (Mukherjee et al. 2016)                                 |
| NaDC | 4.32  | 313.15 | (Mukherjee et al. 2016)                                 |
| NaDC | 5.90  | 313.15 | (Kumar et al. 2015)                                     |
| NaDC | 10.20 | 323.15 | (Maestre et al. 2014)                                   |
| NaDC | 10.10 | 323.15 | (Olesen et al. 2015)                                    |
| NaGC | 13.60 | 283.15 | (Maestre et al. 2014)                                   |
| NaGC | 12.80 | 283.15 | (Olesen et al. 2015)                                    |
| NaGC | 6.80  | 298.15 | (Maestre et al. 2014)                                   |
| NaGC | 4.20  | 298.15 | (Small 1971)                                            |
| NaGC | 6.30  | 298.15 | (Olesen et al. 2015)                                    |
| NaGC | 7.00  | 298.15 | (Miyajima, K., Yokoi, M., Komatsu, H., & Nakagaki 1986) |
| NaGC | 12.00 | 298.15 | (Roda et al. 1983)                                      |

|        |       |        |                                                         |
|--------|-------|--------|---------------------------------------------------------|
| NaGC   | 10.00 | 298.15 | (Nakashima et al. 2002)                                 |
| NaGC   | 14.70 | 310.15 | (Maestre et al. 2014)                                   |
| NaGC   | 14.10 | 310.15 | (Olesen et al. 2015)                                    |
| NaGC   | 16.00 | 323.15 | (Maestre et al. 2014)                                   |
| NaGC   | 15.00 | 323.15 | (Olesen et al. 2015)                                    |
| NaGCDC | 6.00  | 298.15 | (Roda et al. 1983)                                      |
| NaGCDC | 2.30  | 298.15 | (Olesen et al. 2015)                                    |
| NaGCDC | 7.00  | 298.15 | (Roda et al. 1983)                                      |
| NaGCDC | 7.00  | 298.15 | (Roda et al. 1983)                                      |
| NaGCDC | 2.40  | 298.15 | (Nakashima et al. 2002)                                 |
| NaGCDC | 2.10  | 310.15 | (Olesen et al. 2015)                                    |
| NaGDC  | 5.80  | 283.15 | (Maestre et al. 2014)                                   |
| NaGDC  | 5.60  | 283.15 | (Olesen et al. 2015)                                    |
| NaGDC  | 6.00  | 298.15 | (Roda et al. 1983)                                      |
| NaGDC  | 3.30  | 298.15 | (Olesen et al. 2015)                                    |
| NaGDC  | 2.12  | 298.15 | (Kratohvil and DelliColli 1968)                         |
| NaGDC  | 1.10  | 298.15 | (Small 1971)                                            |
| NaGDC  | 1.90  | 298.15 | (Small 1971)                                            |
| NaGDC  | 2.20  | 298.15 | (Nakashima et al. 2002)                                 |
| NaGDC  | 3.43  | 298.15 | (Maestre et al. 2014)                                   |
| NaGDC  | 6.00  | 310.15 | (Maestre et al. 2014)                                   |
| NaGDC  | 5.80  | 310.15 | (Olesen et al. 2015)                                    |
| NaGDC  | 6.60  | 323.15 | (Maestre et al. 2014)                                   |
| NaGDC  | 6.10  | 323.15 | (Olesen et al. 2015)                                    |
| NaTC   | 6.79  | 283.15 | (Mukherjee et al. 2016)                                 |
| NaTC   | 7.92  | 283.15 | (Mukherjee et al. 2016)                                 |
| NaTC   | 4.00  | 283.15 | (Rub et al. 2014)                                       |
| NaTC   | 8.30  | 283.15 | (Olesen et al. 2015)                                    |
| NaTC   | 3.20  | 283.15 | (Carey and Small 1969)                                  |
| NaTC   | 8.80  | 283.15 | (Maestre et al. 2014)                                   |
| NaTC   | 2.80  | 293.15 | (Carey and Small 1969)                                  |
| NaTC   | 4.25  | 293.15 | (Kabir-ud-Din et al. 2011)                              |
| NaTC   | 4.25  | 293.15 | (Rub et al. 2013)                                       |
| NaTC   | 6.68  | 293.15 | (Mukherjee et al. 2016)                                 |
| NaTC   | 7.30  | 293.15 | (Mukherjee et al. 2016)                                 |
| NaTC   | 4.70  | 298.15 | (Roda et al. 1983)                                      |
| NaTC   | 4.50  | 298.15 | (Rub et al. 2013)                                       |
| NaTC   | 4.50  | 298.15 | (Kabir-ud-Din et al. 2011)                              |
| NaTC   | 5.00  | 298.15 | (Olesen et al. 2015)                                    |
| NaTC   | 4.70  | 298.15 | (Azum et al. 2019)                                      |
| NaTC   | 6.00  | 298.15 | (Miyajima, K., Yokoi, M., Komatsu, H., & Nakagaki 1986) |
| NaTC   | 5.60  | 298.15 | (Maestre et al. 2014)                                   |
| NaTC   | 4.75  | 303.15 | (Rub et al. 2013)                                       |
| NaTC   | 4.75  | 303.15 | (Kabir-ud-Din et al. 2011)                              |
| NaTC   | 6.14  | 303.15 | (Mukherjee et al. 2016)                                 |

|       |       |        |                                 |
|-------|-------|--------|---------------------------------|
| NaTC  | 6.81  | 303.15 | (Mukherjee et al. 2016)         |
| NaTC  | 3.10  | 303.15 | (Carey and Small 1969)          |
| NaTC  | 13.70 | 310.15 | (Maestre et al. 2014)           |
| NaTC  | 12.60 | 310.15 | (Olesen et al. 2015)            |
| NaTC  | 12.99 | 310.15 | (Olesen et al. 2015)            |
| NaTC  | 6.36  | 313.15 | (Mukherjee et al. 2016)         |
| NaTC  | 7.20  | 313.15 | (Mukherjee et al. 2016)         |
| NaTC  | 3.00  | 313.15 | (Carey and Small 1969)          |
| NaTC  | 3.30  | 323.15 | (Carey and Small 1969)          |
| NaTC  | 14.10 | 323.15 | (Olesen et al. 2015)            |
| NaTC  | 15.00 | 323.15 | (Maestre et al. 2014)           |
| NaTDC | 2.01  | 283.15 | (Mukherjee et al. 2016)         |
| NaTDC | 2.21  | 283.15 | (Mukherjee et al. 2016)         |
| NaTDC | 4.50  | 283.15 | (Olesen et al. 2015)            |
| NaTDC | 1.80  | 283.15 | (Carey and Small 1969)          |
| NaTDC | 4.56  | 283.15 | (Maestre et al. 2014)           |
| NaTDC | 1.88  | 293.15 | (Mukherjee et al. 2016)         |
| NaTDC | 2.62  | 293.15 | (Mukherjee et al. 2016)         |
| NaTDC | 1.50  | 293.15 | (Carey and Small 1969)          |
| NaTDC | 6.00  | 298.15 | (Jana and Moulik 1991)          |
| NaTDC | 3.05  | 298.15 | (Kratohvil and DelliColli 1968) |
| NaTDC | 2.87  | 298.15 | (Kratohvil and DelliColli 1968) |
| NaTDC | 2.30  | 298.15 | (Olesen et al. 2015)            |
| NaTDC | 4.07  | 298.15 | (Roda et al. 1983)              |
| NaTDC | 4.00  | 298.15 | (Kratohvil, Hsu, and Kwok 1986) |
| NaTDC | 2.30  | 303.15 | (Jana and Moulik 1991)          |
| NaTDC | 3.98  | 303.15 | (Jana and Moulik 1991)          |
| NaTDC | 4.07  | 303.15 | (Jana and Moulik 1991)          |
| NaTDC | 2.43  | 303.15 | (Mukherjee et al. 2016)         |
| NaTDC | 2.90  | 303.15 | (Mukherjee et al. 2016)         |
| NaTDC | 1.80  | 303.15 | (Carey and Small 1969)          |
| NaTDC | 2.88  | 313.15 | (Mukherjee et al. 2016)         |
| NaTDC | 3.50  | 313.15 | (Mukherjee et al. 2016)         |
| NaTDC | 2.10  | 313.15 | (Carey and Small 1969)          |
| NaTDC | 4.53  | 310.15 | (Maestre et al. 2014)           |
| NaTDC | 4.50  | 310.15 | (Olesen et al. 2015)            |
| NaTDC | 2.10  | 323.15 | (Carey and Small 1969)          |
| NaTDC | 5.30  | 323.15 | (Maestre et al. 2014)           |
| NaTDC | 5.20  | 323.15 | (Olesen et al. 2015)            |
| TCDC  | 2.30  | 298.15 | (Olesen et al. 2015)            |
| TCDC  | 7.00  | 298.15 | (Roda et al. 1983)              |
| TCDC  | 2.10  | 310.15 | (Olesen et al. 2015)            |

## References for Table S1

Azum, Naved, Malik Abdul Rub, and Abdullah M. Asiri. 2019. "Bile Salt–Bile Salt Interaction in

- Mixed Monolayer and Mixed Micelle Formation.” *Journal of Chemical Thermodynamics* 128:406–14.
- Carey, Martin C. and Donald M. Small. 1969. “Micellar Properties of Dihydroxy and Trihydroxy Bile Salts: Effects of Counterion and Temperature.” *Journal of Colloid And Interface Science* 31(3):382–96.
- Ćirin, Dejan M., Mihalj M. Poša, and Veljko S. Krstonošić. 2011. “Interactions between Selected Bile Salts and Triton X-100 or Sodium Lauryl Ether Sulfate.” *Chemistry Central Journal* 5(1):89.
- Faustino, Célia M. C., Cláudia S. Serafim, Inês N. Ferreira, Mafalda A. Branco, António R. T. Calado, and Luis Garcia-Rio. 2014. “Mixed Micelle Formation between an Amino Acid-Based Anionic Gemini Surfactant and Bile Salts.” *Industrial and Engineering Chemistry Research* 53(24):10112–18.
- Jana, Pijush Kanti and Satya Priya Moulik. 1991. “Interaction of Bile Salts with Hexadecyltrimethylammonium Bromide and Sodium Dodecyl Sulfate.” *Journal of Physical Chemistry* 95(23):9525–32.
- Juna, K., & Sugano, T. 1969. “Light Scattering by Aqueous Solutions of Sodium Cholate.” *Nippon Kagaku Zasshi* 90:463-466.
- Kabir-ud-Din, Malik Abdul Rub, and Andleeb Z. Naqvi. 2011. “Aqueous Amphiphilic Drug (Amitriptyline Hydrochloride)-Bile Salt Mixtures at Different Temperatures.” *Colloids and Surfaces B: Biointerfaces* 84(2):285–91.
- Kratohvil, J. P. and H. T. DelliColli. 1968. “Micellar Properties of Bile Salts. Sodium Taurodeoxycholate and Sodium Glycodeoxycholate.” *Canadian Journal of Biochemistry* 46(8):945–52.
- Kratohvil, Josip P., Wan P. Hsu, and Daw I. Kwok. 1986. “How Large Are the Micelles of Di- $\alpha$ -Hydroxy Bile Salts at the Critical Micellization Concentrations in Aqueous Electrolyte Solutions? Results for Sodium Taurodeoxycholate and Sodium Deoxycholate.” *Langmuir* 2(2):256–58.
- Kumar, Kuldeep, Baljeet S. Patial, and Suvarcha Chauhan. 2015. “Conductivity and Fluorescence Studies on the Micellization Properties of Sodium Cholate and Sodium Deoxycholate in Aqueous Medium at Different Temperatures: Effect of Selected Amino Acids.” *Journal of Chemical Thermodynamics* 82:25–33.
- Maestre, Alfredo, Pilar Guardado, and María Luisa Moyá. 2014. “Thermodynamic Study of Bile Salts Micellization.” *Journal of Chemical and Engineering Data* 59(2):433–38.
- Mahajan, Suruchi and Rakesh Kumar Mahajan. 2012. “Interactions of Phenothiazine Drugs with Bile Salts: Micellization and Binding Studies.” *Journal of Colloid and Interface Science* 387(1):194–204.
- Matsuoka, Keisuke and Yoshikiyo Moroi. 2002. “Micelle Formation of Sodium Deoxycholate and Sodium Ursodeoxycholate (Part 1).” *Biochimica et Biophysica Acta - Molecular and Cell Biology of Lipids* 1580(2–3):189–99.
- Miyajima, K., Yokoi, M., Komatsu, H., & Nakagaki, M. 1986. “Interaction of  $\beta$ -Cyclodextrin with Bile Salts in Aqueous Solutions.” *Chemical and Pharmaceutical Bulletin* 34(3):1395-1398.
- Mukherjee, Bedachhanda, Aijaz Ahmad Dar, Parvaiz Ahmad Bhat, Satya Priya Moulik, and Akhil Ranjan Das. 2016. “Micellization and Adsorption Behaviour of Bile Salt Systems.” *RSC Advances* 6(3):1769–81.
- Nakashima, Toshio, Tomoyuki Anno, Hiroshi Kanda, Yuka Sato, Tatsuaki Kuroi, Hironari Fujii, Shigemi Nagadome, and Gohsuke Sugihara. 2002. “Potentiometric Study on Critical Micellization Concentrations (CMC) of Sodium Salts of Bile Acids and Their Amino Acid Derivatives.” *Colloids and Surfaces B: Biointerfaces* 24(2):103–10.
- Ninomiya, Ryoko, Keisuke Matsuoka, and Yoshikiyo Moroi. 2003. “Micelle Formation of Sodium Chenodeoxycholate and Solubilization into the Micelles: Comparison with Other Unconjugated Bile Salts.” *Biochimica et Biophysica Acta - Molecular and Cell Biology of Lipids* 1634(3):116–25.

- Olesen, Niels Erik, Peter Westh, and René Holm. 2015. "Determination of Thermodynamic Potentials and the Aggregation Number for Micelles with the Mass-Action Model by Isothermal Titration Calorimetry: A Case Study on Bile Salts." *Journal of Colloid and Interface Science* 453:79–89.
- Poša, Mihalj, Srcrossed Bjedov, Dušan Škorić, and Marija Sakač. 2015. "Micellization Parameters (Number Average, Aggregation Number and Critical Micellar Concentration) of Bile Salt 3 and 7 Ethylidene Derivatives: Role of the Steroidal Skeleton II." *Biochimica et Biophysica Acta - General Subjects* 1850(7):1345–53.
- Poša, Mihalj, Dejan Ćirin, and Veljko Krstonošić. 2013. "Physico-Chemical Properties of Bile Salt-Tween 80 Mixed Micelles in the Viewpoint of Regular Solution Theory." *Chemical Engineering Science* 98:195–202.
- Roda, A., A. F. Hofmann, and K. J. Mysels. 1983. "The Influence of Bile Salt Structure on Self-Association in Aqueous Solutions." *Journal of Biological Chemistry* 258(10):6362–70.
- Rub, Malik Abdul, Mohmad Shafi Sheikh, Abdullah M. Asiri, Naved Azum, Anish Khan, Aftab Aslam Parwaz Khan, Sher Bahadar Khan, and Kabir-Ud-Din. 2013. "Aggregation Behaviour of Amphiphilic Drug and Bile Salt Mixtures at Different Compositions and Temperatures." *Journal of Chemical Thermodynamics* 64:28–39.
- Rub, Malik Abdul, Mohmad Shafi Sheikh, Farah Khan, Sher Bahadar Khan, and Abdullah M. Asiri. 2014. "Bile Salts Aggregation Behavior at Various Temperatures under the Influence of Amphiphilic Drug Imipramine Hydrochloride in Aqueous Medium." *Zeitschrift Fur Physikalische Chemie* 228(6–7):747–67.
- Small, D. M. 1971. *The Physical Chemistry of Cholanic Acids*.
- Subuddhi, Usharani and Ashok K. Mishra. 2007. "Micellization of Bile Salts in Aqueous Medium: A Fluorescence Study." *Colloids and Surfaces B: Biointerfaces* 57(1):102–7.
- Sugihara, Gohsuke and Mitsuru Tanaka. 1976. "A PH and PNa Study of Aqueous Solutions of Sodium Deoxycholate." *Bulletin of the Chemical Society of Japan* 49(12):3457–60.
- Yadav, Sanjay Kumar, Kushan Parikh, and Sanjeev Kumar. 2017. "Mixed Micelle Formation of Cationic Gemini Surfactant with Anionic Bile Salt: A PAH Solubilization Study." *Colloids and Surfaces A: Physicochemical and Engineering Aspects* 522:105–12.

Table S2  $\beta$  values of binary mixtures of bile salts.

| System | Temperature [K] | $\beta$ from literature data | Reference                                   |
|--------|-----------------|------------------------------|---------------------------------------------|
| PU:PC  | 283.15          | 0.43                         | (Mukherjee, Dar, Bhat, Moulik, & Das, 2016) |
| PU:PC  | 293.15          | 0.89                         | (Mukherjee et al., 2016)                    |
| PU:PC  | 298.15          | 1.32                         | (Azum, Rub, & Asiri, 2019)                  |
| PU:PC  | 298.15          | 2.19                         | (Azum et al., 2019)                         |
| PU:PC  | 298.15          | 1.39                         | (Azum et al., 2019)                         |
| PU:PC  | 298.15          | 1.48                         | (Azum et al., 2019)                         |
| PU:PC  | 303.15          | 1.14                         | (Mukherjee et al., 2016)                    |
| PU:PC  | 313.15          | 0.28                         | (Mukherjee et al., 2016)                    |
| PU:SC  | 283.15          | -0.84                        | (Mukherjee et al., 2016)                    |
| PU:SC  | 293.15          | -0.56                        | (Mukherjee et al., 2016)                    |
| PU:SC  | 303.15          | -2.51                        | (Mukherjee et al., 2016)                    |
| PU:SC  | 313.15          | -1.76                        | (Mukherjee et al., 2016)                    |
| PU:SU  | 283.15          | -1.71                        | (Mukherjee et al., 2016)                    |
| PU:SU  | 293.15          | -1.36                        | (Mukherjee et al., 2016)                    |
| PU:SU  | 298.15          | -0.41                        | (Azum et al., 2019)                         |
| PU:SU  | 298.15          | -0.31                        | (Azum et al., 2019)                         |
| PU:SU  | 298.15          | -0.41                        | (Azum et al., 2019)                         |
| PU:SU  | 298.15          | -0.85                        | (Azum et al., 2019)                         |
| PU:SU  | 303.15          | -0.03                        | (Mukherjee et al., 2016)                    |
| PU:SU  | 313.15          | 0.84                         | (Mukherjee et al., 2016)                    |
| SU:PC  | 283.15          | 0.31                         | (Mukherjee et al., 2016)                    |
| SU:PC  | 293.15          | -0.90                        | (Mukherjee et al., 2016)                    |
| SU:PC  | 303.15          | 0.77                         | (Mukherjee et al., 2016)                    |
| SU:PC  | 310.15          | -0.54                        | (Najar, Chat, Dar, & Rather, 2013)          |
| SU:PC  | 313.15          | 0.64                         | (Mukherjee et al., 2016)                    |
| PC:SC  | 283.15          | -0.60                        | (Mukherjee et al., 2016)                    |
| PC:SC  | 293.15          | -3.08                        | (Mukherjee et al., 2016)                    |
| PC:SC  | 303.15          | -3.46                        | (Mukherjee et al., 2016)                    |
| PC:SC  | 313.15          | -2.36                        | (Mukherjee et al., 2016)                    |
| SC:SU  | 283.15          | 0.28                         | (Mukherjee et al., 2016)                    |
| SC:SU  | 293.15          | 0.71                         | (Mukherjee et al., 2016)                    |
| SC:SU  | 303.15          | -0.16                        | (Mukherjee et al., 2016)                    |
| SC:SU  | 313.15          | 1.10                         | (Mukherjee et al., 2016)                    |

## References for Table S2

- Azum, N., Rub, M. A., & Asiri, A. M. (2019). Bile salt–bile salt interaction in mixed monolayer and mixed micelle formation. *Journal of Chemical Thermodynamics*, 128, 406–414.  
<https://doi.org/10.1016/j.jct.2018.08.030>
- Mukherjee, B., Dar, A. A., Bhat, P. A., Moulik, S. P., & Das, A. R. (2016). Micellization and adsorption behaviour of bile salt systems. *RSC Advances*, 6(3), 1769–1781.  
<https://doi.org/10.1039/c5ra20909a>
- Najar, M. H., Chat, O. A., Dar, A. A., & Rather, G. M. (2013). Mixed micellization and mixed



monolayer formation of sodium cholate and sodium deoxycholate in presence of hydrophobic salts under physiological conditions. *Journal of Surfactants and Detergents*, 16(6), 967–973.  
<https://doi.org/10.1007/s11743-013-1443-7>

Table S3 Aggregation numbers of BS

| Bile salt | Temp [K] | Concentration [mM] | CMC   | NaCl   | pH   | Aggregation number | Reference                                                  |
|-----------|----------|--------------------|-------|--------|------|--------------------|------------------------------------------------------------|
| NaGC      | 283.15   | 12.80              | 13.20 | 0.00   | 7.00 | 4.10               | (Olesen, Westh, & Holm, 2015)                              |
| NaGC      | 291.15   | 11.70              | 7.54  | 0.00   | 7.00 | 4.60               | (Olesen et al., 2015)                                      |
| NaGC      | 298.15   | 6.30               | 7.72  | 0.00   | 7.00 | 4.10               | (Olesen et al., 2015)                                      |
| NaGC      | 298.15   | 20.00              | 7.72  | 150.00 | 7.50 | 8.70               | (Matsuoka, Maeda, & Moroi, 2003)                           |
| NaGC      | 310.15   | 10.00              | 14.40 | 120.00 | 7.00 | 5.60               | (Mustan, Ivanova, Madjarova, Tcholakova, & Denkov, 2015)   |
| NaGC      | 310.15   | 14.10              | 14.40 | 0.00   | 7.00 | 6.70               | (Olesen et al., 2015)                                      |
| NaGC      | 323.15   | 15.00              | 15.50 | 0.00   | 7.00 | 6.10               | (Olesen et al., 2015)                                      |
| NaTC      | 273.15   | 6.30               | 6.40  | 0.00   | 7.00 | 2.42               | (Coello, Meijide, Rodríguez Núñez, & Vázquez Tato, 1996)   |
| NaTC      | 273.15   | 6.30               | 6.40  | 0.00   | 7.00 | 2.44               | (Coello et al., 1996)                                      |
| NaTC      | 273.15   | 6.30               | 6.40  | 0.00   | 7.00 | 2.46               | (Coello et al., 1996)                                      |
| NaTC      | 273.15   | 6.30               | 6.40  | 0.00   | 7.00 | 2.52               | (Coello et al., 1996)                                      |
| NaTC      | 273.15   | 6.30               | 6.40  | 0.00   | 7.00 | 2.54               | (Coello et al., 1996)                                      |
| NaTC      | 273.15   | 18.00              | 6.40  | 0.00   | 7.00 | 2.59               | (Coello et al., 1996)                                      |
| NaTC      | 273.15   | 6.30               | 6.40  | 0.00   | 7.00 | 2.65               | (Coello et al., 1996)                                      |
| NaTC      | 273.15   | 6.30               | 6.40  | 0.00   | 7.00 | 2.68               | (Coello et al., 1996)                                      |
| NaTC      | 273.15   | 6.30               | 6.40  | 0.00   | 7.00 | 2.69               | (Coello et al., 1996)                                      |
| NaTC      | 273.15   | 6.30               | 6.40  | 0.00   | 7.00 | 2.69               | (Coello et al., 1996)                                      |
| NaTC      | 273.15   | 6.30               | 6.40  | 0.00   | 7.00 | 2.77               | (Coello et al., 1996)                                      |
| NaTC      | 283.15   | 8.30               | 6.50  | 0.00   | 7.00 | 2.70               | (Olesen et al., 2015)                                      |
| NaTC      | 291.15   | 7.40               | 5.02  | 0.00   | 7.00 | 3.80               | (Olesen et al., 2015)                                      |
| NaTC      | 298.15   | 5.00               | 5.00  | 0.00   | 7.00 | 3.00               | (Olesen et al., 2015)                                      |
| NaTC      | 298.15   | 20.00              | 5.00  | 150.00 | 7.50 | 6.00               | (Matsuoka et al., 2003)                                    |
| NaTC      | 298.20   | 5.00               | 5.00  | 0.00   | 7.00 | 5.00               | (Matsuoka & Yamamoto, 2017)                                |
| NaTC      | 310.00   | 10.00              | 13.50 | 120.00 | 7.00 | 4.50               | (Mustan et al., 2015)                                      |
| NaTC      | 310.15   | 12.60              | 13.50 | 0.00   | 7.00 | 5.00               | (Olesen et al., 2015)                                      |
| NaTC      | 323.15   | 14.10              | 10.80 | 0.00   | 7.00 | 7.30               | (Olesen et al., 2015)                                      |
| NaC       | 273.15   | 19.70              | 5.02  | 0.00   | 7.00 | 3.09               | (Coello et al., 1996)                                      |
| NaC       | 283.15   | 17.90              | 12.50 | 0.00   | 7.00 | 5.50               | (Olesen et al., 2015)                                      |
| NaC       | 283.80   | 12.60              | 12.50 | 0.00   | 7.50 | 4.70               | (Garidel, Hildebrand, Neubert, & Blume, 2000)              |
| NaC       | 284.30   | 12.50              | 12.50 | 100.00 | 7.50 | 5.50               | (Garidel et al., 2000)                                     |
| NaC       | 291.15   | 14.40              | 9.24  | 0.00   | 7.00 | 6.20               | (Olesen et al., 2015)                                      |
| NaC       | 298.15   | 4.00               | 4.07  | 0.00   | 7.00 | 3.00               | (Maldonado-Valderrama, Wilde, MacIerzanka, & MacKie, 2011) |
| NaC       | 298.15   | 9.70               | 4.07  | 0.00   | 7.00 | 4.80               | (Olesen et al., 2015)                                      |
| NaC       | 298.15   | 20.00              | 4.07  | 0.00   | 7.00 | 7.00               | (Matsuoka & Moroi, 2002)                                   |
| NaC       | 298.15   | 20.00              | 4.07  | 0.00   | 7.00 | 8.00               | (Maldonado-Valderrama et al., 2011)                        |
| NaC       | 298.15   | 9.00               | 4.07  | 0.00   | 7.00 | 9.00               | (Abdul Rub, Azum, & Asiri, 2017)                           |
| NaC       | 310.00   | 10.00              | 8.20  | 120.00 | 7.00 | 4.80               | (Mustan et al., 2015)                                      |
| NaC       | 310.15   | 18.80              | 8.20  | 0.00   | 7.00 | 6.20               | (Olesen et al., 2015)                                      |

|       |        |       |        |        |      |       |                                     |
|-------|--------|-------|--------|--------|------|-------|-------------------------------------|
| NaC   | 323.15 | 17.50 | 10.15  | 0.00   | 7.00 | 5.20  | (Olesen et al., 2015)               |
| NaC   | 327.90 | 14.00 | 10.30  | 100.00 | 7.50 | 5.40  | (Garidel et al., 2000)              |
| NaC   | 328.10 | 18.30 | 10.30  | 0.00   | 7.50 | 6.10  | (Garidel et al., 2000)              |
| NaGDC | 291.15 | 4.40  | 2.80   | 0.00   | 7.00 | 6.00  | (Olesen et al., 2015)               |
| NaGDC | 298.15 | 3.30  | 2.86   | 0.00   | 7.00 | 7.60  | (Olesen et al., 2015)               |
| NaGDC | 310.15 | 5.80  | 5.90   | 0.00   | 7.00 | 7.40  | (Olesen et al., 2015)               |
| NaGDC | 323.15 | 6.10  | 6.35   | 0.00   | 7.00 | 6.60  | (Olesen et al., 2015)               |
| NaTDC | 273.15 | 3.00  | 2.95   | 0.00   | 7.00 | 2.92  | (Coello et al., 1996)               |
| NaTDC | 273.15 | 3.00  | 2.95   | 0.00   | 7.00 | 4.87  | (Coello et al., 1996)               |
| NaTDC | 273.15 | 3.00  | 2.95   | 0.00   | 7.00 | 4.96  | (Coello et al., 1996)               |
| NaTDC | 273.15 | 3.00  | 2.95   | 0.00   | 7.00 | 5.15  | (Coello et al., 1996)               |
| NaTDC | 273.15 | 3.00  | 2.95   | 0.00   | 7.00 | 5.28  | (Coello et al., 1996)               |
| NaTDC | 273.15 | 7.00  | 2.95   | 0.00   | 7.00 | 5.42  | (Coello et al., 1996)               |
| NaTDC | 273.15 | 3.00  | 2.95   | 0.00   | 7.00 | 5.44  | (Coello et al., 1996)               |
| NaTDC | 273.15 | 3.00  | 2.95   | 0.00   | 7.00 | 5.61  | (Coello et al., 1996)               |
| NaTDC | 273.15 | 3.00  | 2.95   | 0.00   | 7.00 | 5.79  | (Coello et al., 1996)               |
| NaTDC | 273.15 | 3.00  | 2.95   | 0.00   | 7.00 | 6.01  | (Coello et al., 1996)               |
| NaTDC | 273.15 | 3.00  | 2.95   | 0.00   | 7.00 | 6.22  | (Coello et al., 1996)               |
| NaTDC | 283.15 | 4.50  | 3.02   | 0.00   | 7.00 | 7.00  | (Olesen et al., 2015)               |
| NaTDC | 291.15 | 3.00  | 2.97   | 0.00   | 7.00 | 5.20  | (Olesen et al., 2015)               |
| NaTDC | 298.15 | 2.30  | 3.72   | 0.00   | 7.00 | 6.70  | (Olesen et al., 2015)               |
| NaTDC | 298.20 | 3.72  | 372.00 | 0.00   | 7.00 | 9.00  | (Matsuoka & Yamamoto, 2017)         |
| NaTDC | 310.15 | 4.50  | 13.15  | 0.00   | 7.00 | 8.00  | (Olesen et al., 2015)               |
| NaTDC | 323.15 | 5.20  | 4.20   | 0.00   | 7.00 | 7.10  | (Olesen et al., 2015)               |
| NaDC  | 273.15 | 4.24  | 4.30   | 0.00   | 7.00 | 5.78  | (Coello et al., 1996)               |
| NaDC  | 273.15 | 4.24  | 4.30   | 0.00   | 7.00 | 5.79  | (Coello et al., 1996)               |
| NaDC  | 273.15 | 4.24  | 4.30   | 0.00   | 7.00 | 5.80  | (Coello et al., 1996)               |
| NaDC  | 273.15 | 4.24  | 4.30   | 0.00   | 7.00 | 5.80  | (Coello et al., 1996)               |
| NaDC  | 273.15 | 13.00 | 4.30   | 0.00   | 7.00 | 5.82  | (Coello et al., 1996)               |
| NaDC  | 273.15 | 4.24  | 4.30   | 0.00   | 7.00 | 5.84  | (Coello et al., 1996)               |
| NaDC  | 273.15 | 4.24  | 4.30   | 0.00   | 7.00 | 5.85  | (Coello et al., 1996)               |
| NaDC  | 273.15 | 4.24  | 4.30   | 0.00   | 7.00 | 5.85  | (Coello et al., 1996)               |
| NaDC  | 273.15 | 4.24  | 4.30   | 0.00   | 7.00 | 5.86  | (Coello et al., 1996)               |
| NaDC  | 273.15 | 4.24  | 4.30   | 0.00   | 7.00 | 5.86  | (Coello et al., 1996)               |
| NaDC  | 273.15 | 4.24  | 4.30   | 0.00   | 7.00 | 6.74  | (Coello et al., 1996)               |
| NaDC  | 283.15 | 5.10  | 4.40   | 0.00   | 7.00 | 5.10  | (Olesen et al., 2015)               |
| NaDC  | 285.80 | 4.40  | 4.43   | 0.00   | 7.50 | 7.00  | (Garidel et al., 2000)              |
| NaDC  | 291.15 | 7.10  | 3.67   | 0.00   | 7.00 | 7.10  | (Olesen et al., 2015)               |
| NaDC  | 298.15 | 3.10  | 4.07   | 0.00   | 7.00 | 3.10  | (Olesen et al., 2015)               |
| NaDC  | 298.15 | 2.00  | 4.07   | 0.00   | 7.00 | 6.00  | (Maldonado-Valderrama et al., 2011) |
| NaDC  | 298.15 | 20.00 | 4.07   | 0.00   | 7.00 | 10.00 | (Matsuoka & Moroi, 2002)            |
| NaDC  | 310.15 | 7.00  | 8.20   | 0.00   | 7.00 | 7.00  | (Olesen et al., 2015)               |

|      |        |       |       |        |      |      |                                     |
|------|--------|-------|-------|--------|------|------|-------------------------------------|
| NaDC | 323.15 | 6.40  | 10.15 | 0.00   | 7.00 | 6.40 | (Olesen et al., 2015)               |
| NaDC | 327.80 | 4.00  | 10.30 | 100.00 | 7.50 | 7.30 | (Garidel et al., 2000)              |
| NaDC | 328.20 | 10.15 | 10.30 | 0.00   | 7.50 | 5.40 | (Garidel et al., 2000)              |
| NaGC | 283.15 | 12.80 | 13.20 | 0.00   | 7.00 | 4.10 | (Olesen et al., 2015)               |
| NaGC | 291.15 | 11.70 | 7.54  | 0.00   | 7.00 | 4.60 | (Olesen et al., 2015)               |
| NaGC | 298.15 | 6.30  | 7.72  | 0.00   | 7.00 | 4.10 | (Olesen et al., 2015)               |
| NaGC | 298.15 | 20.00 | 7.72  | 150.00 | 7.50 | 8.70 | (Matsuoka et al., 2003)             |
| NaGC | 310.15 | 10.00 | 14.40 | 120.00 | 7.00 | 5.60 | (Mustan et al., 2015)               |
| NaGC | 310.15 | 14.10 | 14.40 | 0.00   | 7.00 | 6.70 | (Olesen et al., 2015)               |
| NaGC | 323.15 | 15.00 | 15.50 | 0.00   | 7.00 | 6.10 | (Olesen et al., 2015)               |
| NaTC | 273.15 | 6.30  | 6.40  | 0.00   | 7.00 | 2.42 | (Coello et al., 1996)               |
| NaTC | 273.15 | 6.30  | 6.40  | 0.00   | 7.00 | 2.44 | (Coello et al., 1996)               |
| NaTC | 273.15 | 6.30  | 6.40  | 0.00   | 7.00 | 2.46 | (Coello et al., 1996)               |
| NaTC | 273.15 | 6.30  | 6.40  | 0.00   | 7.00 | 2.52 | (Coello et al., 1996)               |
| NaTC | 273.15 | 6.30  | 6.40  | 0.00   | 7.00 | 2.54 | (Coello et al., 1996)               |
| NaTC | 273.15 | 18.00 | 6.40  | 0.00   | 7.00 | 2.59 | (Coello et al., 1996)               |
| NaTC | 273.15 | 6.30  | 6.40  | 0.00   | 7.00 | 2.65 | (Coello et al., 1996)               |
| NaTC | 273.15 | 6.30  | 6.40  | 0.00   | 7.00 | 2.68 | (Coello et al., 1996)               |
| NaTC | 273.15 | 6.30  | 6.40  | 0.00   | 7.00 | 2.69 | (Coello et al., 1996)               |
| NaTC | 273.15 | 6.30  | 6.40  | 0.00   | 7.00 | 2.69 | (Coello et al., 1996)               |
| NaTC | 273.15 | 6.30  | 6.40  | 0.00   | 7.00 | 2.77 | (Coello et al., 1996)               |
| NaTC | 283.15 | 8.30  | 6.50  | 0.00   | 7.00 | 2.70 | (Olesen et al., 2015)               |
| NaTC | 291.15 | 7.40  | 5.02  | 0.00   | 7.00 | 3.80 | (Olesen et al., 2015)               |
| NaTC | 298.15 | 5.00  | 5.00  | 0.00   | 7.00 | 3.00 | (Olesen et al., 2015)               |
| NaTC | 298.15 | 20.00 | 5.00  | 150.00 | 7.50 | 6.00 | (Matsuoka et al., 2003)             |
| NaTC | 298.20 | 5.00  | 5.00  | 0.00   | 7.00 | 5.00 | (Matsuoka & Yamamoto, 2017)         |
| NaTC | 310.00 | 10.00 | 13.50 | 120.00 | 7.00 | 4.50 | (Mustan et al., 2015)               |
| NaTC | 310.15 | 12.60 | 13.50 | 0.00   | 7.00 | 5.00 | (Olesen et al., 2015)               |
| NaTC | 323.15 | 14.10 | 10.80 | 0.00   | 7.00 | 7.30 | (Olesen et al., 2015)               |
| NaC  | 273.15 | 19.70 | 5.02  | 0.00   | 7.00 | 3.09 | (Coello et al., 1996)               |
| NaC  | 283.15 | 17.90 | 12.50 | 0.00   | 7.00 | 5.50 | (Olesen et al., 2015)               |
| NaC  | 283.80 | 12.60 | 12.50 | 0.00   | 7.50 | 4.70 | (Garidel et al., 2000)              |
| NaC  | 284.30 | 12.50 | 12.50 | 100.00 | 7.50 | 5.50 | (Garidel et al., 2000)              |
| NaC  | 291.15 | 14.40 | 9.24  | 0.00   | 7.00 | 6.20 | (Olesen et al., 2015)               |
| NaC  | 298.15 | 4.00  | 4.07  | 0.00   | 7.00 | 3.00 | (Maldonado-Valderrama et al., 2011) |
| NaC  | 298.15 | 9.70  | 4.07  | 0.00   | 7.00 | 4.80 | (Olesen et al., 2015)               |
| NaC  | 298.15 | 20.00 | 4.07  | 0.00   | 7.00 | 7.00 | (Matsuoka & Moroi, 2002)            |
| NaC  | 298.15 | 20.00 | 4.07  | 0.00   | 7.00 | 8.00 | (Maldonado-Valderrama et al., 2011) |
| NaC  | 298.15 | 9.00  | 4.07  | 0.00   | 7.00 | 9.00 | (Abdul Rub et al., 2017)            |
| NaC  | 310.00 | 10.00 | 8.20  | 120.00 | 7.00 | 4.80 | (Mustan et al., 2015)               |
| NaC  | 310.15 | 18.80 | 8.20  | 0.00   | 7.00 | 6.20 | (Olesen et al., 2015)               |
| NaC  | 323.15 | 17.50 | 10.15 | 0.00   | 7.00 | 5.20 | (Olesen et al., 2015)               |

|       |        |       |       |        |      |       |                                     |
|-------|--------|-------|-------|--------|------|-------|-------------------------------------|
| NaC   | 327.90 | 14.00 | 10.30 | 100.00 | 7.50 | 5.40  | (Garidel et al., 2000)              |
| NaC   | 328.10 | 18.30 | 10.30 | 0.00   | 7.50 | 6.10  | (Garidel et al., 2000)              |
| NaGDC | 291.15 | 4.40  | 2.80  | 0.00   | 7.00 | 6.00  | (Olesen et al., 2015)               |
| NaGDC | 298.15 | 3.30  | 2.86  | 0.00   | 7.00 | 7.60  | (Olesen et al., 2015)               |
| NaGDC | 310.15 | 5.80  | 5.90  | 0.00   | 7.00 | 7.40  | (Olesen et al., 2015)               |
| NaGDC | 323.15 | 6.10  | 6.35  | 0.00   | 7.00 | 6.60  | (Olesen et al., 2015)               |
| NaTDC | 273.15 | 3.00  | 2.95  | 0.00   | 7.00 | 2.92  | (Coello et al., 1996)               |
| NaTDC | 273.15 | 3.00  | 2.95  | 0.00   | 7.00 | 4.87  | (Coello et al., 1996)               |
| NaTDC | 273.15 | 3.00  | 2.95  | 0.00   | 7.00 | 4.96  | (Coello et al., 1996)               |
| NaTDC | 273.15 | 3.00  | 2.95  | 0.00   | 7.00 | 5.15  | (Coello et al., 1996)               |
| NaTDC | 273.15 | 3.00  | 2.95  | 0.00   | 7.00 | 5.28  | (Coello et al., 1996)               |
| NaTDC | 273.15 | 7.00  | 2.95  | 0.00   | 7.00 | 5.42  | (Coello et al., 1996)               |
| NaTDC | 273.15 | 3.00  | 2.95  | 0.00   | 7.00 | 5.44  | (Coello et al., 1996)               |
| NaTDC | 273.15 | 3.00  | 2.95  | 0.00   | 7.00 | 5.61  | (Coello et al., 1996)               |
| NaTDC | 273.15 | 3.00  | 2.95  | 0.00   | 7.00 | 5.79  | (Coello et al., 1996)               |
| NaTDC | 273.15 | 3.00  | 2.95  | 0.00   | 7.00 | 6.01  | (Coello et al., 1996)               |
| NaTDC | 273.15 | 3.00  | 2.95  | 0.00   | 7.00 | 6.22  | (Coello et al., 1996)               |
| NaTDC | 283.15 | 4.50  | 3.02  | 0.00   | 7.00 | 7.00  | (Olesen et al., 2015)               |
| NaTDC | 291.15 | 3.00  | 2.97  | 0.00   | 7.00 | 5.20  | (Olesen et al., 2015)               |
| NaTDC | 298.15 | 2.30  | 3.72  | 0.00   | 7.00 | 6.70  | (Olesen et al., 2015)               |
| NaTDC | 298.20 | 3.72  | 3.72  | 0.00   | 7.00 | 9.00  | (Matsuoka & Yamamoto, 2017)         |
| NaTDC | 310.15 | 4.50  | 13.15 | 0.00   | 7.00 | 8.00  | (Olesen et al., 2015)               |
| NaTDC | 323.15 | 5.20  | 4.20  | 0.00   | 7.00 | 7.10  | (Olesen et al., 2015)               |
| NaDC  | 273.15 | 4.24  | 4.30  | 0.00   | 7.00 | 5.78  | (Coello et al., 1996)               |
| NaDC  | 273.15 | 4.24  | 4.30  | 0.00   | 7.00 | 5.79  | (Coello et al., 1996)               |
| NaDC  | 273.15 | 4.24  | 4.30  | 0.00   | 7.00 | 5.80  | (Coello et al., 1996)               |
| NaDC  | 273.15 | 4.24  | 4.30  | 0.00   | 7.00 | 5.80  | (Coello et al., 1996)               |
| NaDC  | 273.15 | 13.00 | 4.30  | 0.00   | 7.00 | 5.82  | (Coello et al., 1996)               |
| NaDC  | 273.15 | 4.24  | 4.30  | 0.00   | 7.00 | 5.84  | (Coello et al., 1996)               |
| NaDC  | 273.15 | 4.24  | 4.30  | 0.00   | 7.00 | 5.85  | (Coello et al., 1996)               |
| NaDC  | 273.15 | 4.24  | 4.30  | 0.00   | 7.00 | 5.85  | (Coello et al., 1996)               |
| NaDC  | 273.15 | 4.24  | 4.30  | 0.00   | 7.00 | 5.86  | (Coello et al., 1996)               |
| NaDC  | 273.15 | 4.24  | 4.30  | 0.00   | 7.00 | 5.86  | (Coello et al., 1996)               |
| NaDC  | 273.15 | 4.24  | 4.30  | 0.00   | 7.00 | 6.74  | (Coello et al., 1996)               |
| NaDC  | 283.15 | 5.10  | 4.40  | 0.00   | 7.00 | 5.10  | (Olesen et al., 2015)               |
| NaDC  | 285.80 | 4.40  | 4.43  | 0.00   | 7.50 | 7.00  | (Garidel et al., 2000)              |
| NaDC  | 291.15 | 7.10  | 3.67  | 0.00   | 7.00 | 7.10  | (Olesen et al., 2015)               |
| NaDC  | 298.15 | 3.10  | 4.07  | 0.00   | 7.00 | 3.10  | (Olesen et al., 2015)               |
| NaDC  | 298.15 | 2.00  | 4.07  | 0.00   | 7.00 | 6.00  | (Maldonado-Valderrama et al., 2011) |
| NaDC  | 298.15 | 20.00 | 4.07  | 0.00   | 7.00 | 10.00 | (Matsuoka & Moroi, 2002)            |
| NaDC  | 310.15 | 7.00  | 8.20  | 0.00   | 7.00 | 7.00  | (Olesen et al., 2015)               |
| NaDC  | 323.15 | 6.40  | 10.15 | 0.00   | 7.00 | 6.40  | (Olesen et al., 2015)               |

|      |        |       |       |        |      |      |                        |
|------|--------|-------|-------|--------|------|------|------------------------|
| NaDC | 327.80 | 4.00  | 10.30 | 100.00 | 7.50 | 7.30 | (Garidel et al., 2000) |
| NaDC | 328.20 | 10.15 | 10.30 | 0.00   | 7.50 | 5.40 | (Garidel et al., 2000) |

## References for Table S3

- Abdul Rub, M., Azum, N., & Asiri, A. M. (2017). Binary Mixtures of Sodium Salt of Ibuprofen and Selected Bile Salts: Interface, Micellar, Thermodynamic, and Spectroscopic Study. *Journal of Chemical and Engineering Data*, 62(10), 3216–3228. <https://doi.org/10.1021/acs.jced.7b00298>
- Coello, A., Meijide, F., Rodríguez Núñez, E., & Vázquez Tato, J. V. (1996). Aggregation behavior of bile salts in aqueous solution. *Journal of Pharmaceutical Sciences*, 85(1), 9–15. <https://doi.org/10.1021/js950326j>
- Garidel, P., Hildebrand, A., Neubert, R., & Blume, A. (2000). Thermodynamic characterization of bile salt aggregation as a function of temperature and ionic strength using isothermal titration calorimetry. *Langmuir*, 16(12), 5267–5275. <https://doi.org/10.1021/la9912390>
- Maldonado-Valderrama, J., Wilde, P., MacIerzanka, A., & MacKie, A. (2011). The role of bile salts in digestion. *Advances in Colloid and Interface Science*, 165(1), 36–46. <https://doi.org/10.1016/j.cis.2010.12.002>
- Matsuoka, K., Maeda, M., & Moroi, Y. (2003). Micelle formation of sodium glyco- and taurocholates and sodium glyco- and taurodeoxycholates and solubilization of cholesterol into their micelles. *Colloids and Surfaces B: Biointerfaces*, 32(2), 87–95. [https://doi.org/10.1016/S0927-7765\(03\)00148-6](https://doi.org/10.1016/S0927-7765(03)00148-6)
- Matsuoka, K., & Moroi, Y. (2002). Micelle formation of sodium deoxycholate and sodium ursodeoxycholate (Part 1). *Biochimica et Biophysica Acta - Molecular and Cell Biology of Lipids*, 1580(2–3), 189–199. [https://doi.org/10.1016/S1388-1981\(01\)00203-7](https://doi.org/10.1016/S1388-1981(01)00203-7)
- Matsuoka, K., & Yamamoto, A. (2017). Study on micelle formation of bile salt using nuclear magnetic resonance spectroscopy. *Journal of Oleo Science*, 66(10), 1129–1137. <https://doi.org/10.5650/jos.ess17063>
- Mustan, F., Ivanova, A., Madjarova, G., Tcholakova, S., & Denkov, N. (2015). Molecular Dynamics Simulation of the Aggregation Patterns in Aqueous Solutions of Bile Salts at Physiological Conditions. *Journal of Physical Chemistry B*, 119(51), 15631–15643. <https://doi.org/10.1021/acs.jpcb.5b07063>
- Olesen, N. E., Westh, P., & Holm, R. (2015). Determination of thermodynamic potentials and the aggregation number for micelles with the mass-action model by isothermal titration calorimetry: A case study on bile salts. *Journal of Colloid and Interface Science*, 453, 79–89. <https://doi.org/10.1016/j.jcis.2015.03.069>

Table S4 MSR values for BSs with given solubilizates

| BS  | Solubilizate       | logK <sub>ow</sub> | Volume | Temp [K] | pH   | Na <sup>+</sup> [M] | MSR  | Reference                            |
|-----|--------------------|--------------------|--------|----------|------|---------------------|------|--------------------------------------|
| TDC | Azobenzene         | 4.13               | 174.56 | 310.15   | 6.30 | 15.00               | 0.04 | (Hofmann, 1963)                      |
| TCD | Azobenzene         | 4.13               | 174.56 | 310.15   | 6.30 | 15.00               | 0.03 | (Hofmann, 1963)                      |
| C   | Azobenzene         | 4.13               | 174.56 | 310.15   | 6.30 | 15.00               | 0.02 | (Hofmann, 1963)                      |
| TC  | Azobenzene         | 4.13               | 174.56 | 310.15   | 6.30 | 15.00               | 0.05 | (Hofmann, 1963)                      |
| GDC | Azobenzene         | 4.13               | 174.56 | 310.15   | 6.30 | 15.00               | 0.04 | (Hofmann, 1963)                      |
| GCD | Azobenzene         | 4.13               | 174.56 | 310.15   | 6.30 | 15.00               | 0.02 | (Hofmann, 1963)                      |
| C   | Azobenzene         | 4.13               | 174.56 | 310.15   | 6.30 | 15.00               | 0.02 | (Hofmann, 1963)                      |
| GC  | Azobenzene         | 4.13               | 174.56 | 310.15   | 6.30 | 15.00               | 0.02 | (Hofmann, 1963)                      |
| TDC | Monoolein          | 6.61               | 386.27 | 310.15   | 6.30 | 0.15                | 1.41 | (Hofmann, 1963)                      |
| TCD | Monoolein          | 6.61               | 386.27 | 310.15   | 6.30 | 0.15                | 1.58 | (Hofmann, 1963)                      |
| C   | Monoolein          | 6.61               | 386.27 | 310.15   | 6.30 | 0.15                | 0.84 | (Hofmann, 1963)                      |
| TC  | Monoolein          | 6.61               | 386.27 | 310.15   | 6.30 | 0.15                | 1.76 | (Hofmann, 1963)                      |
| GDC | Monoolein          | 6.61               | 386.27 | 310.15   | 6.30 | 0.15                | 1.90 | (Hofmann, 1963)                      |
| GCD | Monoolein          | 6.61               | 386.27 | 310.15   | 6.30 | 0.15                | 1.42 | (Hofmann, 1963)                      |
| C   | Monoolein          | 6.61               | 386.27 | 310.15   | 6.30 | 0.15                | 1.42 | (Hofmann, 1963)                      |
| GC  | Monoolein          | 6.61               | 386.27 | 310.15   | 6.30 | 0.15                | 1.42 | (Hofmann, 1963)                      |
| GDC | vit. K             | 8.80               | 483.87 | 298.15   | 7.00 | 0.00                | 0.03 | (Nagata, Yotsuyanagi, & Ikeda, 1988) |
| GC  | vit. K             | 8.80               | 483.87 | 298.15   | 7.00 | 0.00                | 0.02 | (Nagata et al., 1988)                |
| GDC | vit. K             | 8.80               | 483.87 | 298.15   | 7.50 | 0.00                | 0.03 | (Nagata et al., 1988)                |
| GC  | vit. K             | 8.80               | 483.87 | 298.15   | 7.50 | 0.00                | 0.02 | (Nagata et al., 1988)                |
| GDC | cholesterol        | 7.62               | 423.13 | 310.15   | 7.00 | 0.00                | 0.46 | (Neiderhiser & Roth, 1968)           |
| TDC | cholesterol        | 7.62               | 423.13 | 310.15   | 7.00 | 0.00                | 0.37 | (Neiderhiser & Roth, 1968)           |
| GC  | cholesterol        | 7.62               | 423.13 | 310.15   | 7.00 | 0.00                | 0.36 | (Neiderhiser & Roth, 1968)           |
| GCD | cholesterol        | 7.62               | 423.13 | 310.15   | 7.00 | 0.00                | 0.29 | (Neiderhiser & Roth, 1968)           |
| C   | cholesterol        | 7.62               | 423.13 | 310.15   | 7.00 | 0.00                | 0.27 | (Neiderhiser & Roth, 1968)           |
| TC  | cholesterol        | 7.62               | 423.13 | 310.15   | 7.00 | 0.00                | 0.27 | (Neiderhiser & Roth, 1968)           |
| TCD | cholesterol        | 7.62               | 423.13 | 310.15   | 7.00 | 0.00                | 0.23 | (Neiderhiser & Roth, 1968)           |
| C   | Benzene            | 1.94               | 84.04  | 298.00   | 7.00 | 0.00                | 0.90 | (Kolehmainen, 1985)                  |
| C   | Fluorobenzene      | 2.10               | 88.97  | 298.00   | 7.00 | 0.00                | 0.45 | (Kolehmainen, 1985)                  |
| C   | Hexafluorobenzene  | 2.63               | 113.63 | 298.00   | 7.00 | 0.00                | 0.55 | (Kolehmainen, 1985)                  |
| C   | Toluene            | 2.39               | 100.60 | 298.00   | 7.00 | 0.00                | 0.45 | (Kolehmainen, 1985)                  |
| C   | p-Fluorotoluene    | 2.55               | 105.54 | 298.00   | 7.00 | 0.00                | 0.45 | (Kolehmainen, 1985)                  |
| C   | Styrene            | 2.79               | 111.78 | 298.00   | 7.00 | 0.00                | 0.60 | (Kolehmainen, 1985)                  |
| C   | propenylbenzene    | 3.04               | 128.02 | 298.00   | 7.00 | 0.00                | 0.40 | (Kolehmainen, 1985)                  |
| C   | Anisole            | 1.99               | 109.59 | 298.00   | 7.00 | 0.00                | 0.50 | (Kolehmainen, 1985)                  |
| C   | Fluoroanisole      | 2.11               | 114.52 | 298.00   | 7.00 | 0.00                | 1.00 | (Kolehmainen, 1985)                  |
| C   | Acetophenone       | 1.84               | 119.59 | 298.00   | 7.00 | 0.00                | 0.80 | (Kolehmainen, 1985)                  |
| C   | Fluoroacetophenone | 1.98               | 124.52 | 298.00   | 7.00 | 0.00                | 0.50 | (Kolehmainen, 1985)                  |
| C   | Nitrobenzene       | 1.90               | 107.38 | 298.00   | 7.00 | 0.00                | 0.25 | (Kolehmainen, 1985)                  |
| C   | Mesitylene         | 3.21               | 133.73 | 298.00   | 7.00 | 0.00                | 0.35 | (Kolehmainen, 1985)                  |
| C   | Tetraline          | 3.15               | 140.41 | 298.00   | 7.00 | 0.00                | 1.30 | (Kolehmainen, 1985)                  |
| C   | Veatrole           | 1.61               | 135.13 | 298.00   | 7.00 | 0.00                | 1.45 | (Kolehmainen, 1985)                  |
| DC  | Benzene            | 1.94               | 84.04  | 298.00   | 7.00 | 0.00                | 0.81 | (Kolehmainen, 1985)                  |
| DC  | Fluorobenzene      | 2.10               | 88.97  | 298.00   | 7.00 | 0.00                | 0.76 | (Kolehmainen, 1985)                  |
| DC  | Fluorotoluene      | 2.50               | 105.54 | 298.00   | 7.00 | 0.00                | 0.72 | (Kolehmainen, 1985)                  |
| DC  | Fluoroanisole      | 2.11               | 114.52 | 298.00   | 7.00 | 0.00                | 0.96 | (Kolehmainen, 1985)                  |

|    |                          |      |        |        |           |      |      |                                                    |
|----|--------------------------|------|--------|--------|-----------|------|------|----------------------------------------------------|
| DC | vit. K                   | 8.80 | 483.87 | 298.15 | 7.00      | 0.00 | 0.05 | (Nagata et al., 1988)                              |
| C  | vit. K                   | 8.80 | 483.87 | 298.15 | 7.00      | 0.00 | 0.03 | (Nagata et al., 1988)                              |
| DC | vit. K                   | 8.80 | 483.87 | 298.15 | 7.50      | 0.00 | 0.05 | (Nagata et al., 1988)                              |
| C  | vit. K                   | 8.80 | 483.87 | 298.15 | 7.50      | 0.00 | 0.02 | (Nagata et al., 1988)                              |
| C  | Cholesterol              | 7.62 | 423.13 | 310.15 | 10.0<br>0 | 0.00 | 0.04 | (Nagadome, Okazaki, Lee, Sasaki, & Sugihara, 2001) |
| C  | Stigmasterol             | 7.87 | 450.33 | 310.15 | 10.0<br>0 | 0.00 | 0.02 | (Nagadome et al., 2001)                            |
| C  | Cholesterol+Stigmasterol | 7.70 | 426.73 | 310.15 | 10.0<br>0 | 0.00 | 0.04 | (Nagadome et al., 2001)                            |
| C  | cholestanol              | 7.80 | 429.34 | 310.15 | 10.0<br>0 | 0.00 | 0.03 | (Nagadome et al., 2001)                            |
| DC | Cholesterol              | 7.62 | 423.13 | 310.15 | 10.0<br>0 | 0.00 | 0.07 | (Nagadome et al., 2001)                            |
| DC | Stigmasterol             | 7.87 | 450.33 | 310.15 | 10.0<br>0 | 0.00 | 0.04 | (Nagadome et al., 2001)                            |
| DC | Cholesterol+Stigmasterol | 7.70 | 436.73 | 310.15 | 10.0<br>0 | 0.00 | 0.08 | (Nagadome et al., 2001)                            |
| DC | Cholestanol              | 7.80 | 429.34 | 310.15 | 10.0<br>0 | 0.00 | 0.06 | (Nagadome et al., 2001)                            |

### References for Table S4

- Hofmann, A. F. (1963). The function of bile salts in fat absorption. The solvent properties of dilute micellar solutions of conjugated bile salts. *Biochemical Journal*, 89(1), 57–68. <https://doi.org/10.1042/bj0890057>
- Kolehmainen, E. (1985). Solubilization of aromatics in aqueous bile salts. I. benzene and alkylbenzenes in sodium cholate: <sup>1</sup>H NMR study. *Journal of Colloid And Interface Science*, 105(1), 273–277. [https://doi.org/10.1016/0021-9797\(85\)90369-8](https://doi.org/10.1016/0021-9797(85)90369-8)
- Nagadome, S., Okazaki, Y., Lee, S., Sasaki, Y., & Sugihara, G. (2001). Selective solubilization of sterols by bile salt micelles in water: A thermodynamic study. *Langmuir*, 17(14), 4405–4412. <https://doi.org/10.1021/la010087h>
- Nagata, M., Yotsuyanagi, T., & Ikeda, K. (1988). Solubilization of Vitamin K1 by Bile Salts and Phosphatidylcholine-Bile Salts Mixed Micelles. *Journal of Pharmacy and Pharmacology*, 40(2), 85–88. <https://doi.org/10.1111/j.2042-7158.1988.tb05186.x>
- Neiderhiser, D. H., & Roth, H. P. (1968). Cholesterol Solubilization by Solutions of Bile Salts and Bile Salts Plus Lecithin. *Proceedings of the Society for Experimental Biology and Medicine*, 128(1), 221–225. <https://doi.org/10.3181/00379727-128-32983>



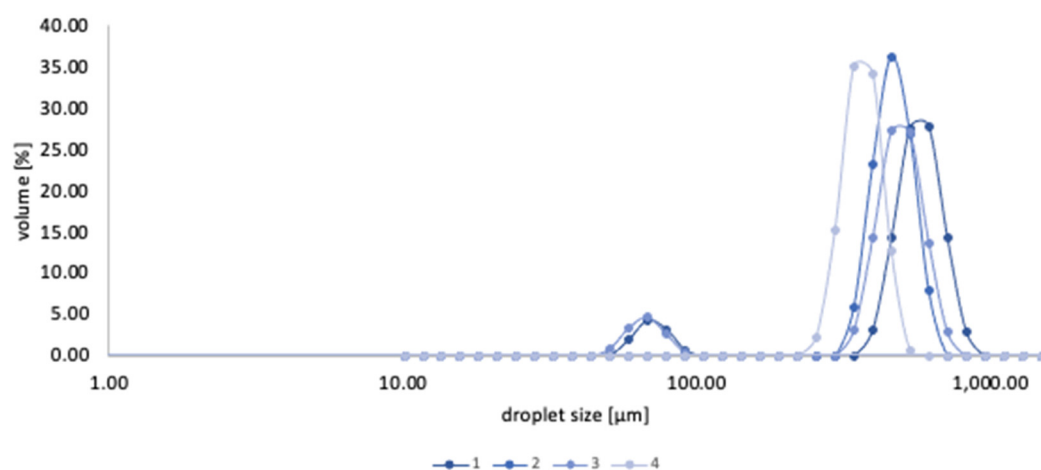

Figure S1. Particle size distribution of O/W emulsion with 0.5% WPI. Numbers: 1,2,3,4 corresponds to each number of run.

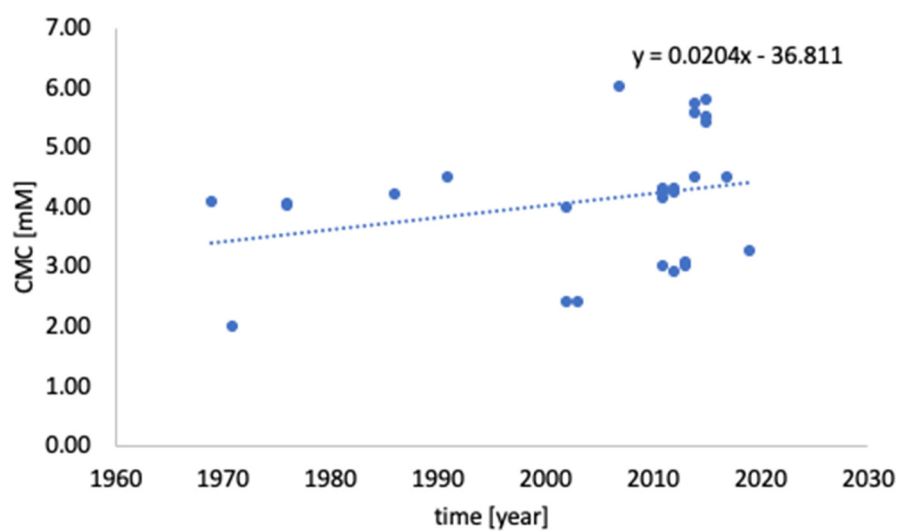

Figure S2. CMC of NaDC at 298.15K increased from 3.92 mM in the 1960-70s to an average of ~4.16 mM in the 2010-2020.
